# Supplementary material for: Levels of enzyme activities in six lysosomal storage diseases in Japanese neonates determined by liquid chromatography-tandem mass spectrometry
Source: PubMed Central journal article supplement (PMC5011175; doi:10.1016/j.ymgmr.2016.08.007), 2016-08-31

### Supplementary Table 1

UPLC method for the measurement of enzyme activities for 6 LSDs.

---

|                         |                                                                          |
|-------------------------|--------------------------------------------------------------------------|
| Column temperature      | 40°C                                                                     |
| Weak wash solvent       | MeOH/CH <sub>3</sub> CN/IPA/0.1%aqueous formic acid                      |
| Strong wash solvent     | MeOH/CH <sub>3</sub> CN/IPA/0.1%aqueous formic acid                      |
| Mobile phase            | CH <sub>3</sub> CN/H <sub>2</sub> O/0.2% formic acid in H <sub>2</sub> O |
| Flow rate               | 0.3 mL/min                                                               |
| Injection volume        | 10 µL                                                                    |
| Injection mode          | Direct injection                                                         |
| Autosampler temperature | 4°C                                                                      |

---

LSD, lysosomal storage disorder.

**Supplementary Table 2**

Instrument parameters for the measurement of substrates, internal standards and products of 6 LSD enzyme activities using LC-MS/MS.

---

|                             |          |
|-----------------------------|----------|
| Interface                   | ESI      |
| Polarity                    | Positive |
| Capillary voltage           | 2.0 kV   |
| Source temperature          | 120°C    |
| Desolvation temperature     | 450°C    |
| Flow rate of nebulizing gas | 800L/h   |
| Flow rate of drying gas     | 50 L/h   |
| Analyzing mode              | MRM      |
| Scan time                   | 0.2 s    |
| Data format                 | Centroid |

---

**Supplementary Table 3**

Product ion, precursor ion, cone voltage and collision energy for the fragmentation of substrates, products and internal standards using LC-MS/MS.

| Species | Precursor ion<br>( <i>m/z</i> ) | Product ion<br>( <i>m/z</i> ) | Cone<br>(V) | Collision energy<br>(V) |
|---------|---------------------------------|-------------------------------|-------------|-------------------------|
| GAA-S   | 660.4                           | 560.3                         | 25          | 22                      |
| GAA-P   | 498.3                           | 398.3                         | 10          | 20                      |
| GAA-IS  | 503.4                           | 403.3                         | 10          | 16                      |
| GLA-S   | 646.4                           | 546.3                         | 23          | 19                      |
| GLA-P   | 484.3                           | 384.2                         | 22          | 12                      |
| GLA-IS  | 489.3                           | 389.3                         | 22          | 12                      |
| IDUA-S  | 602.3                           | 317.2                         | 35          | 14                      |
| IDUA-P  | 426.2                           | 317.2                         | 20          | 12                      |
| IDUA-IS | 431.3                           | 322.2                         | 20          | 15                      |
| ABG-S   | 546.4                           | 264.2                         | 20          | 15                      |
| ABG-P   | 384.4                           | 264.3                         | 15          | 12                      |
| ABG-IS  | 391.4                           | 271.3                         | 15          | 12                      |
| ASM-S   | 563.4                           | 184.0                         | 15          | 30                      |
| ASM-P   | 398.4                           | 264.3                         | 15          | 20                      |
| ASM-IS  | 405.4                           | 264.3                         | 15          | 20                      |
| GALC-S  | 574.5                           | 264.3                         | 20          | 25                      |
| GALC-P  | 412.4                           | 264.3                         | 20          | 15                      |
| GALC-IS | 417.4                           | 264.3                         | 20          | 18                      |

GAA,  $\alpha$ -glucosidase; GLA,  $\alpha$ -galactosidase A ; IDUA,  $\alpha$ -L-iduronidase; ABG, glucocerebrosidase; ASM, acid sphingomyelinase; GALC, galactosylceramidase.

**Supplementary Table 4**

Retention times for the substrates, products and internal standards of assay for lysosomal enzyme activities using LC-MS/MS.

| Column             | Column 1<br>(ACQUITY BEH C18) | Column 2<br>(Chromolith) | Column 3<br>(Mono Tower C18) |
|--------------------|-------------------------------|--------------------------|------------------------------|
| Flow rate (mL/min) | 0.3                           | 0.3                      | 0.6                          |
| Species            | Retention time (min)          |                          |                              |
| GAA-S              | 0.63                          | 0.74                     | 1.16                         |
| GAA-P              | 0.99                          | 1.04                     | 1.59                         |
| GAA-IS             | 0.98                          | 1.04                     | 1.59                         |
| GLA-S              | 0.57                          | 0.70                     | 1.10                         |
| GLA-P              | 0.85                          | 0.94                     | 1.48                         |
| GLA-IS             | 0.86                          | 0.94                     | 1.48                         |
| IDUA-S             | 0.50                          | 0.63                     | 0.95                         |
| IDUA-P             | 0.53                          | 0.66                     | 1.07                         |
| IDUA-IS            | 0.53                          | 0.66                     | 1.05                         |
| ABG-S              | 2.73                          | 2.36                     | 2.81                         |
| ABG-P              | 3.85                          | 3.30                     | 3.71                         |
| ABG-IS             | 3.85                          | 3.30                     | 3.70                         |
| ASM-S              | 2.49                          | 2.40                     | 2.61                         |
| ASM-P              | 4.21                          | 3.58                     | 2.09                         |
| ASM-IS             | 4.20                          | 3.58                     | 2.10                         |
| GALC-S             | 3.42                          | 2.89                     | 3.27                         |
| GALC-P             | 4.56                          | 3.84                     | 2.80                         |
| GALC-IS            | 4.56                          | 3.84                     | 2.78                         |

**Supplementary Table 5**Intraday and interday assay precision for multiple analyses of the CDC quality control samples.<sup>a</sup>

| CDC QC                   | Intraday CV (%) |      |      |      |      |      | Interday CV (%) |      |      |      |      |      |
|--------------------------|-----------------|------|------|------|------|------|-----------------|------|------|------|------|------|
|                          | GAA             | GLA  | IDUA | ABG  | ASM  | GALC | GAA             | GLA  | IDUA | ABG  | ASM  | GALC |
| High (100% whole blood)  | 12.1            | 8.3  | 12.5 | 0.6  | 8.9  | 6.8  | 7.4             | 5.5  | 14.1 | 18.0 | 17.3 | 10.5 |
| Middle (50% whole blood) | 18.2            | 9.6  | 16.5 | 10.1 | 2.9  | 8.9  | 11.9            | 4.0  | 19.8 | 22.1 | 11.1 | 14.7 |
| Low (5% whole blood)     | 25.8            | 15.7 | 4.0  | 5.7  | 12.9 | 10.1 | 10.9            | 27.0 | 47.0 | 17.8 | 6.7  | 2.9  |
| Base (0% whole blood)    | 52.9            | 36.5 | 18.9 | 9.5  | 12.0 | 7.3  | 17.1            | 38.1 | 56.0 | 19.0 | 4.6  | 7.6  |
| Replicate ( <i>n</i> )   | 3               | 3    | 3    | 3    | 3    | 3    | 4               | 4    | 4    | 4    | 4    | 4    |

<sup>a</sup>Data obtained using a Chromolith column.

**A**

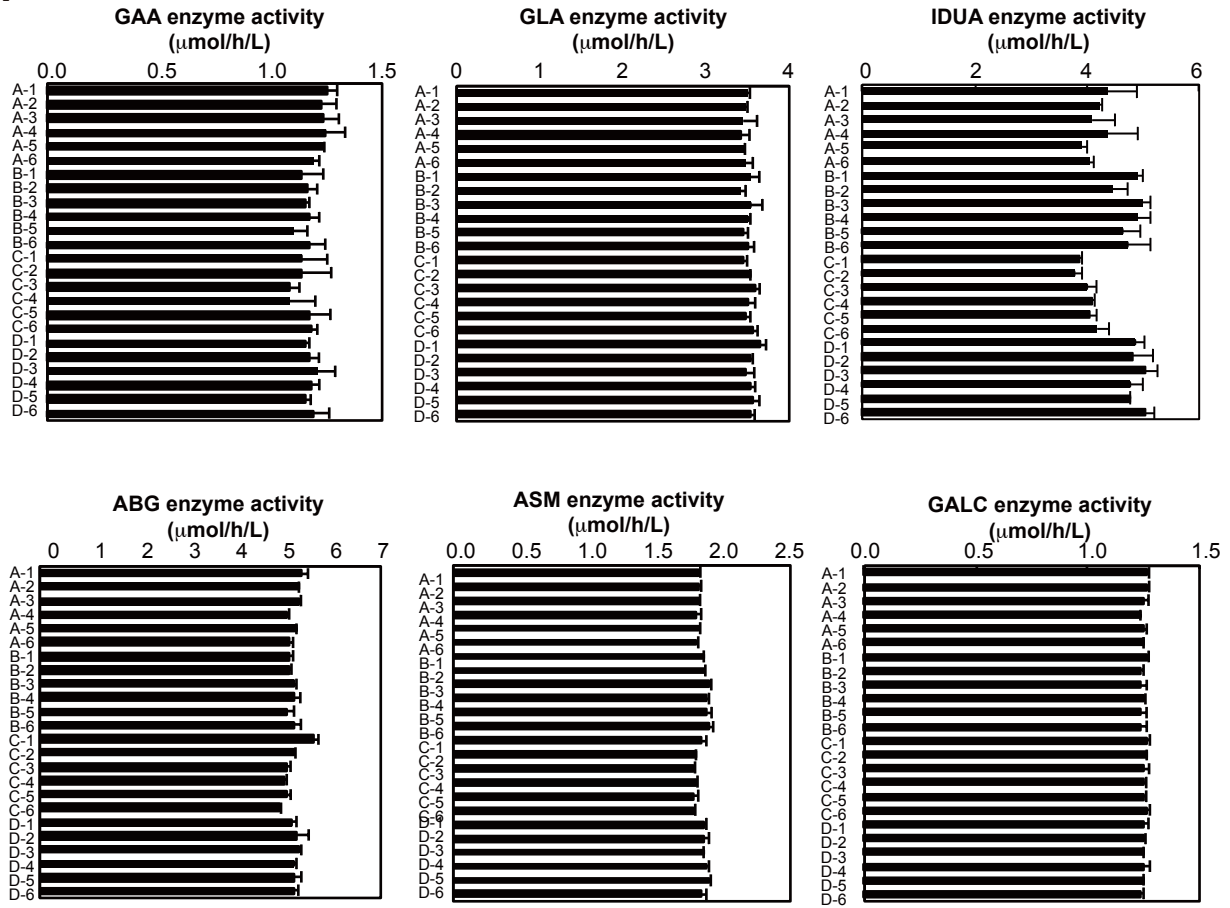

**B**

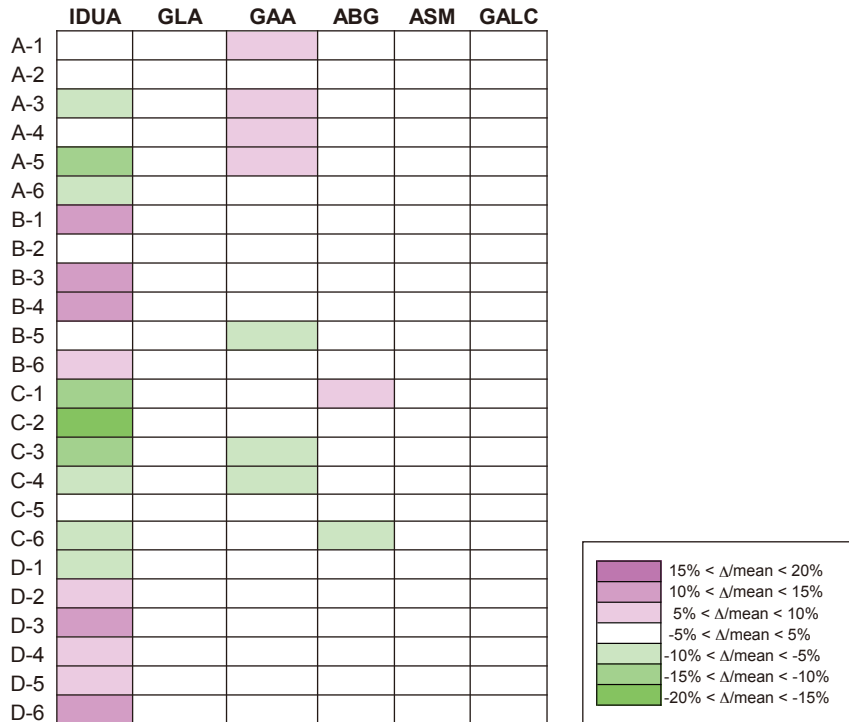

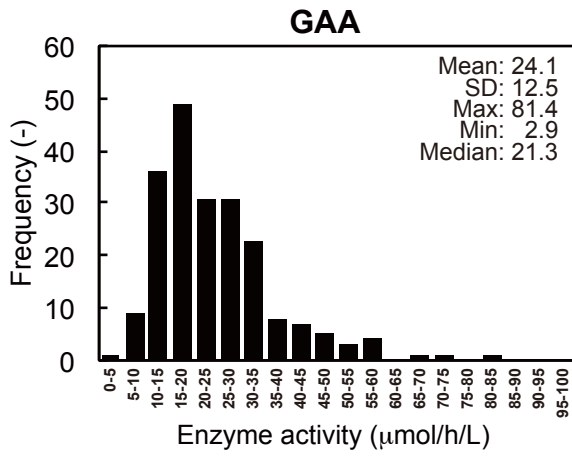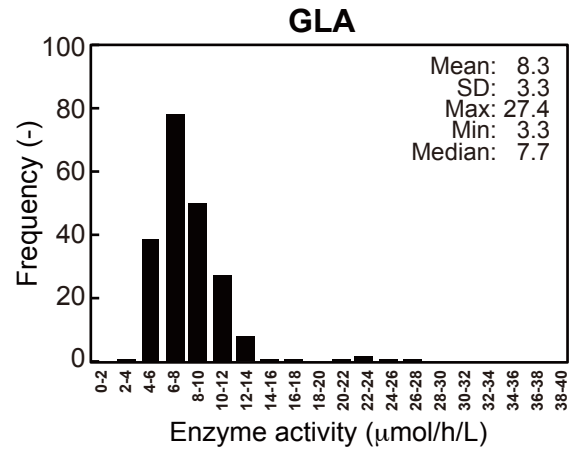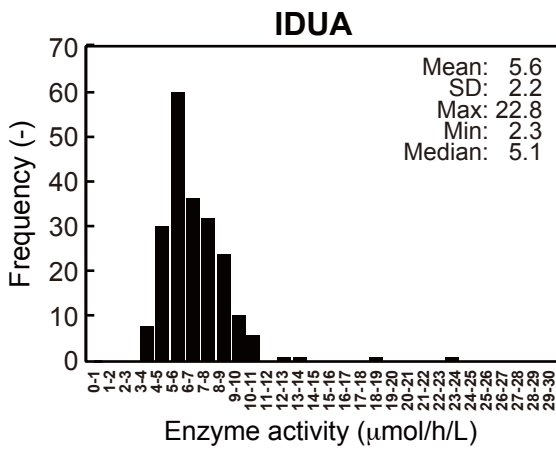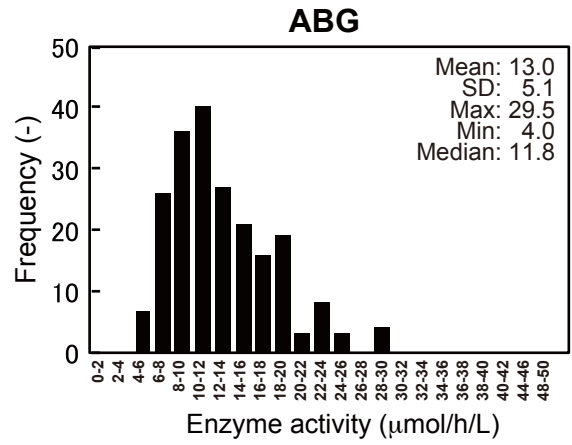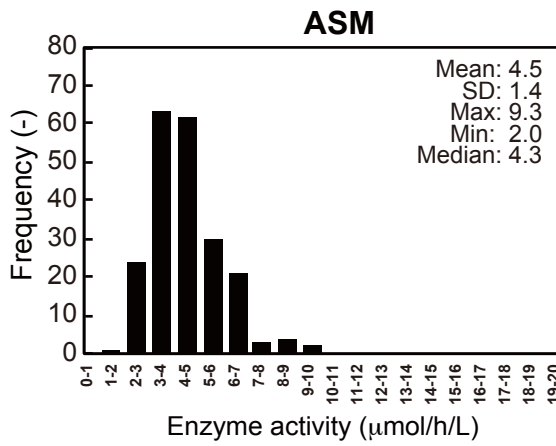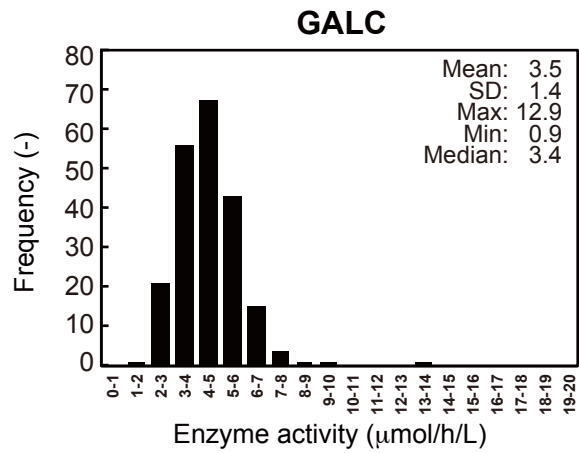

Supplement: mmc1.pdf [file mmc1.pdf]
